# Supplementary material for: Selectively Modified Lactose and N-Acetyllactosamine Analogs at Three Key Positions to Afford Effective Galectin-3 Ligands
Source: MDPI journal article supplement (doi:10.3390/ijms24043718), 2023-02-13
Supplement: s1 [file s1]

## *Supporting Information*

# **Selectively Modified Lactose and N-Acetylactosamine Analogues at Three Key Positions to Afford Effective Galectin-3 Ligands**

**Shuay Abdullayev<sup>1</sup>, Priyanka Kadav<sup>2</sup>, Purnima Bandyopadhyay<sup>2</sup>, Francisco Javier Medrano<sup>3</sup>,  
Gabriel A. Rabinovich<sup>4</sup>, Tarun K. Dam<sup>2</sup>, Antonio Romero<sup>3,\*</sup>, René Roy<sup>1,\*</sup>**

<sup>1</sup> Glycosciences and Nanomaterials Laboratory, Université du Québec à Montréal, P.O. Box 8888, Succ. Centre-Ville, Montréal, Québec H3C 3P8, Canada

<sup>2</sup> Laboratory of Mechanistic Glycobiology, Department of Chemistry, Michigan Technological University, 1400 Townsend Drive, Houghton, MI 49931, USA

<sup>3</sup> Centro de Investigaciones Biológicas “Margarita Salas” (CIB), CSIC, E-28040 Madrid, Spain

<sup>4</sup> Laboratorio de Glicomedicina, Instituto de Biología y Medicina Experimental (IBYME), Consejo Nacional de Investigaciones Científicas y Técnicas (CONICET), Vuelta de Obligado 2490, C1428- Ciudad de Buenos Aires, Argentina

\* Correspondence: romero@cic.csic.es (A.R.); roy.rene@uqam.ca (R.R.)

<sup>1</sup>H and <sup>13</sup>C NMR (300 and 75 MHz, CDCl<sub>3</sub>) spectra of compounds **3-33**.

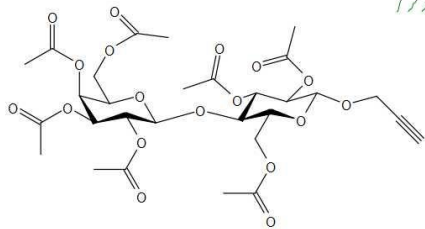[illegible]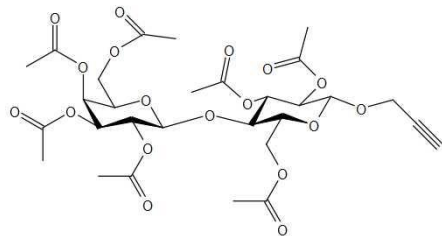

**Figure S2.**  $^{13}\text{C}$  NMR (75 MHz,  $\text{CDCl}_3$ ) spectrum of compound **3**.

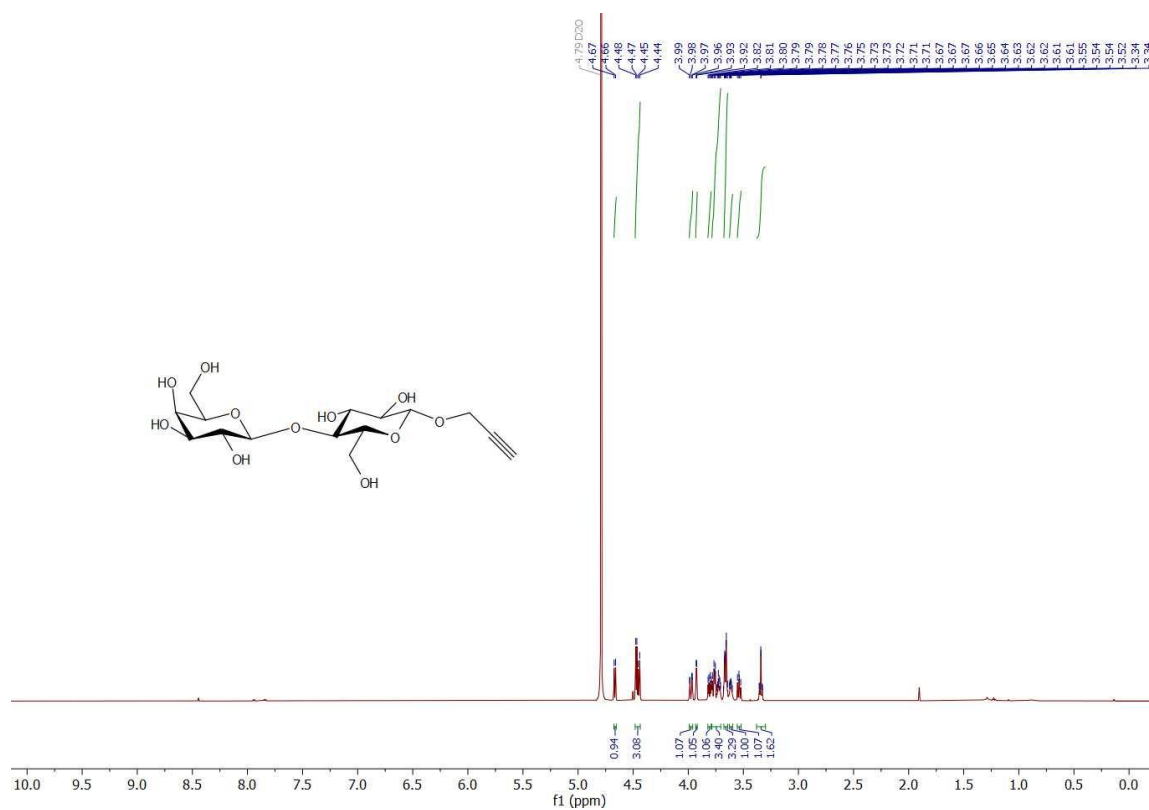

Figure S3. <sup>1</sup>H NMR (600 MHz, D<sub>2</sub>O) spectrum of compound 4.

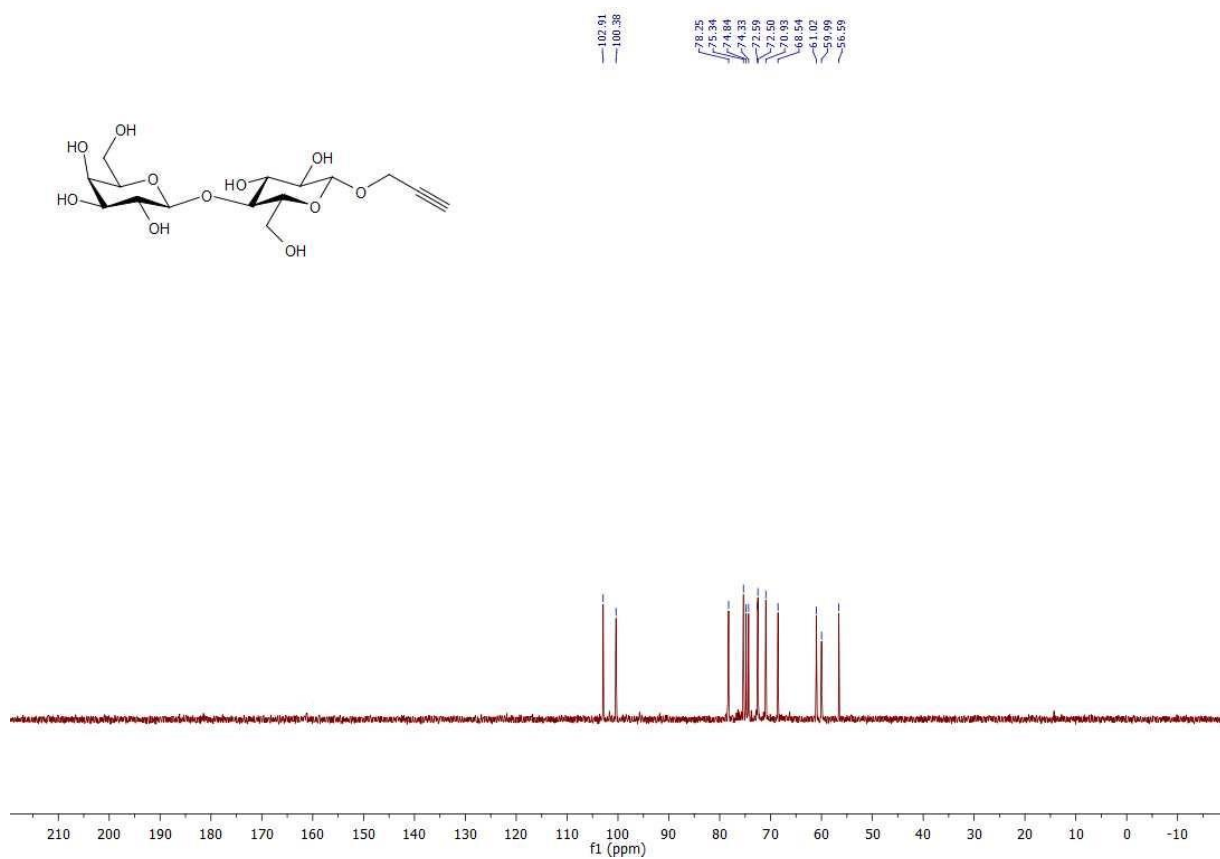

Figure S4. <sup>13</sup>C NMR (75 MHz, D<sub>2</sub>O) spectrum of compound 4.

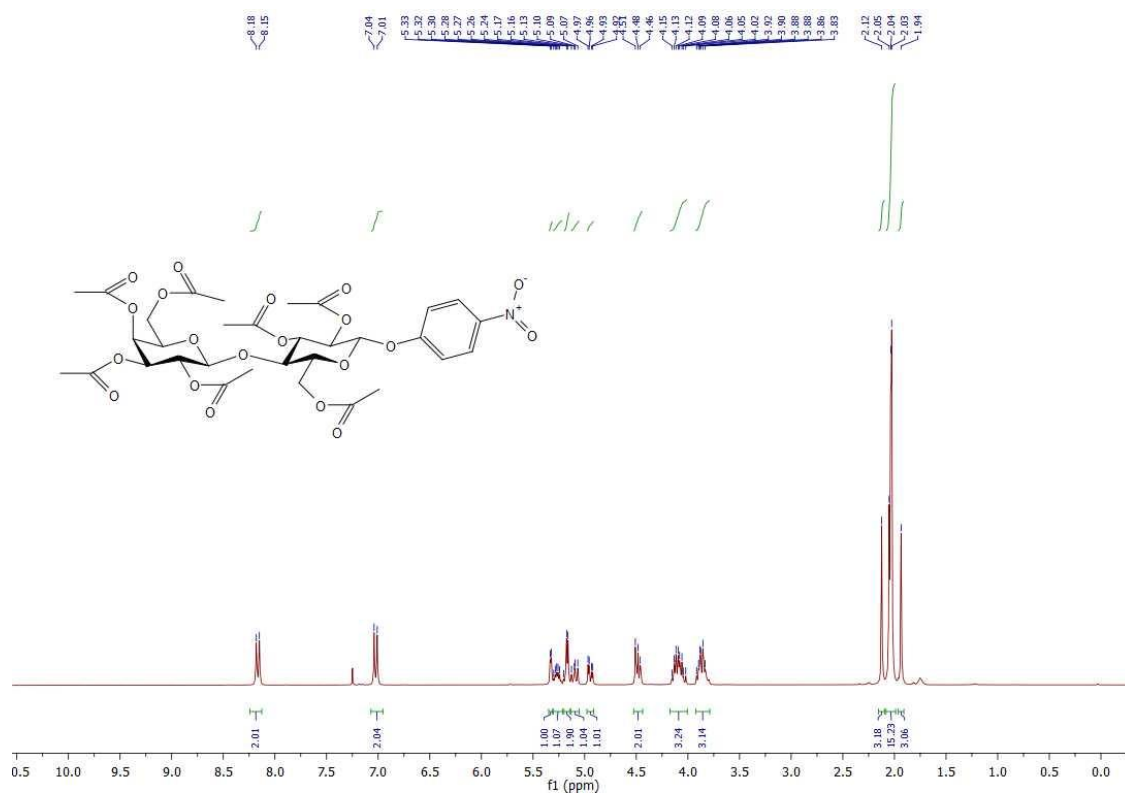

Figure S5. <sup>1</sup>H NMR (300 MHz, CDCl<sub>3</sub>) spectrum of compound 5.

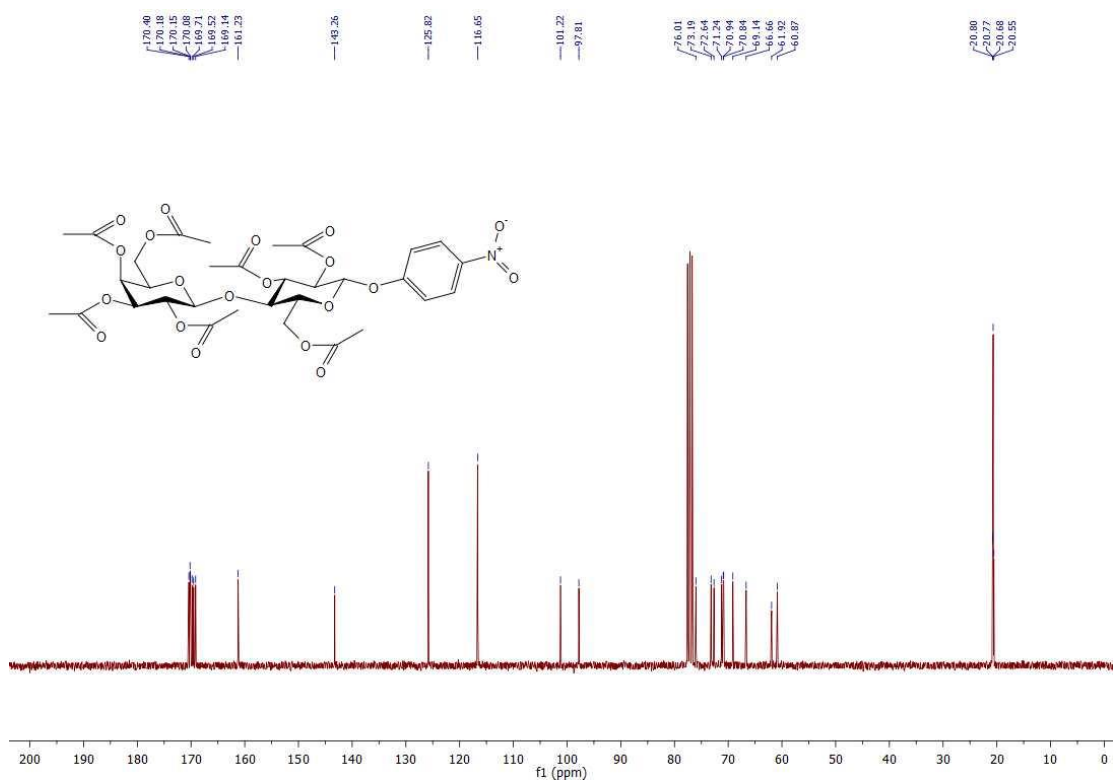

Figure S6. <sup>13</sup>C NMR (75 MHz, CDCl<sub>3</sub>) spectrum of compound 5.

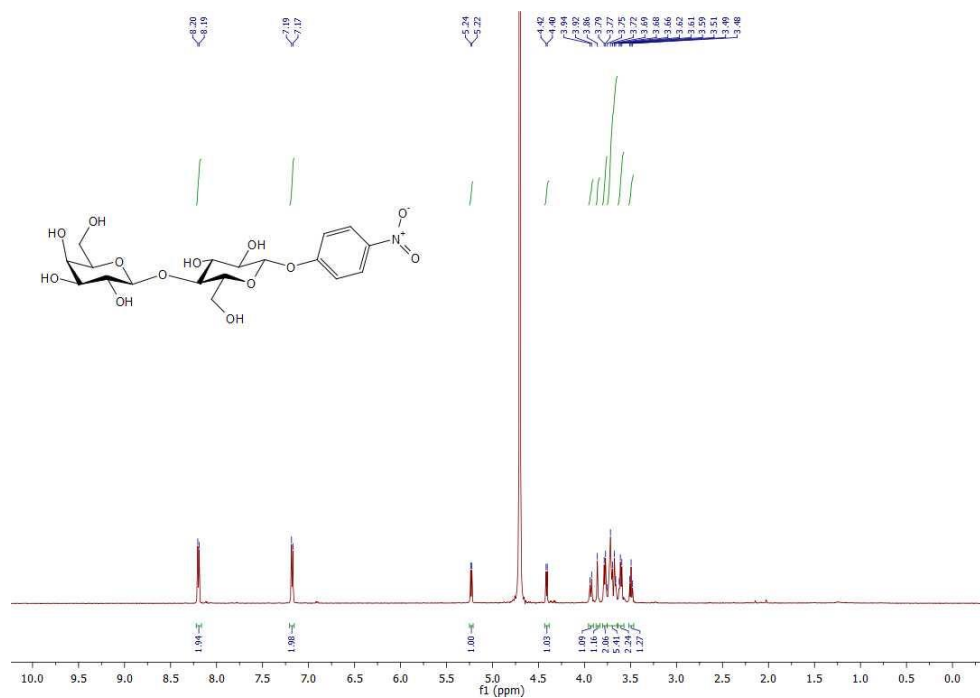

Figure S7. <sup>1</sup>H NMR (600 MHz, D<sub>2</sub>O) spectrum of compound 6.

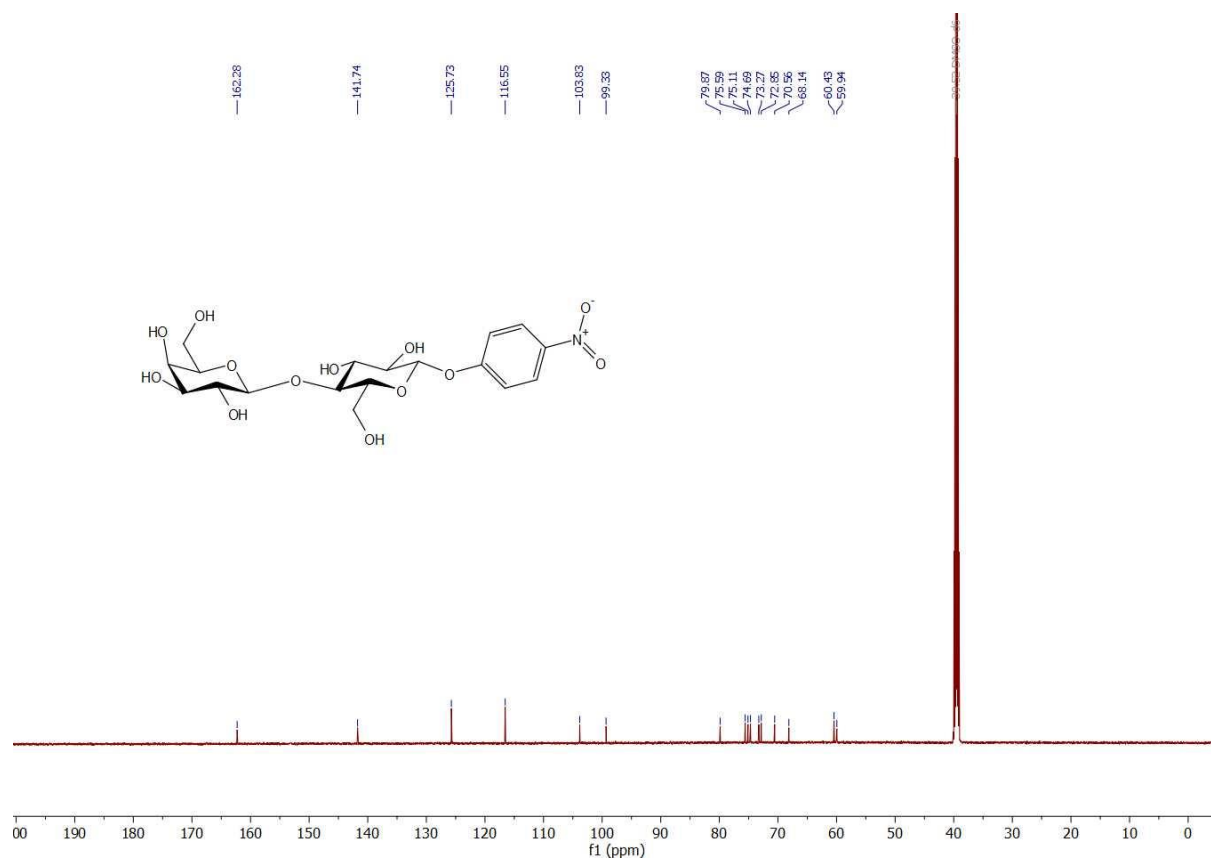

Figure S8. <sup>13</sup>C NMR (150 MHz, DMSO-d<sub>6</sub>) spectrum of compound 6.

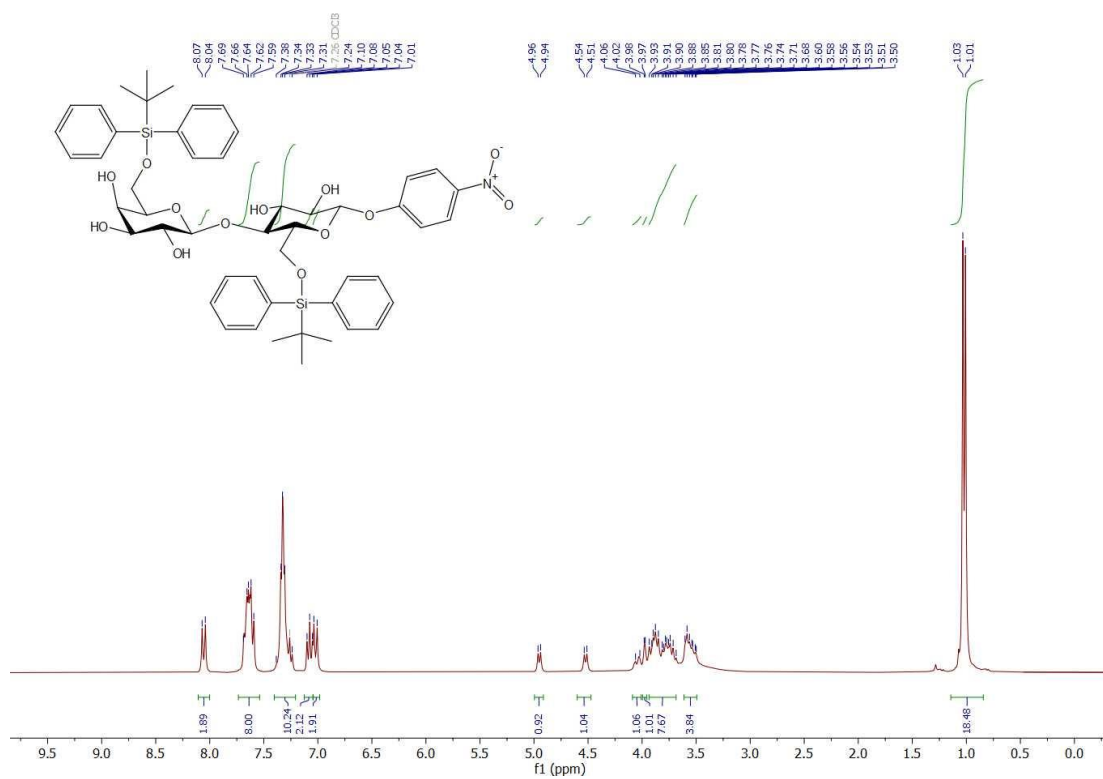

**Figure S9.** <sup>1</sup>H NMR (300 MHz, CDCl<sub>3</sub>) spectrum of compound 8.

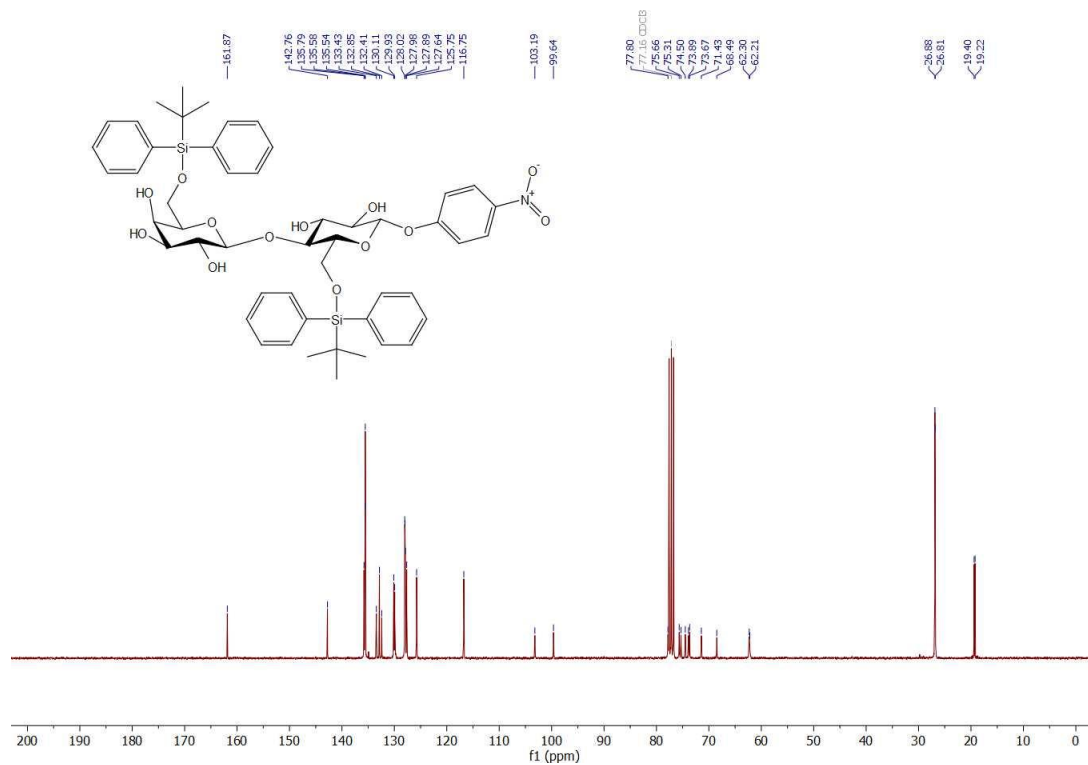

**Figure S10.** <sup>13</sup>C NMR (75 MHz, CDCl<sub>3</sub>) spectrum of compound 8

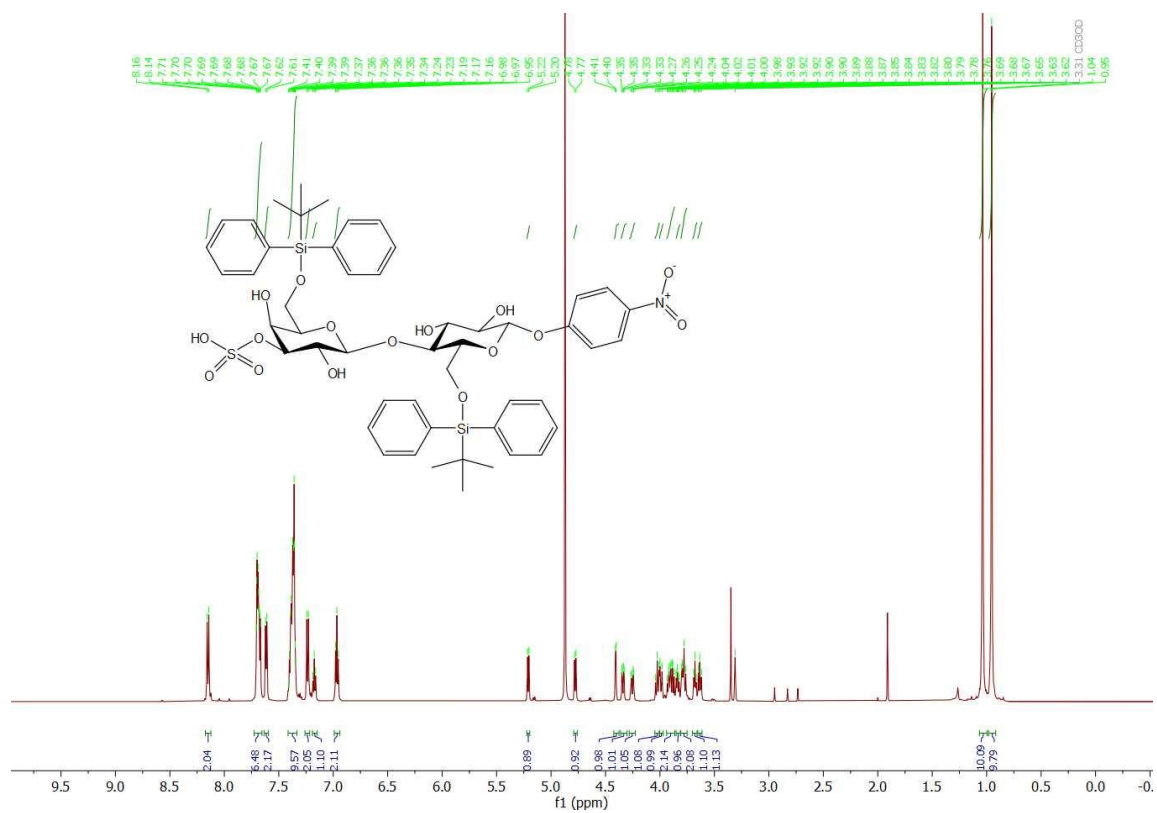

**Figure S11.** <sup>1</sup>H NMR (600 MHz, CD<sub>3</sub>OD) spectrum of compound 10.

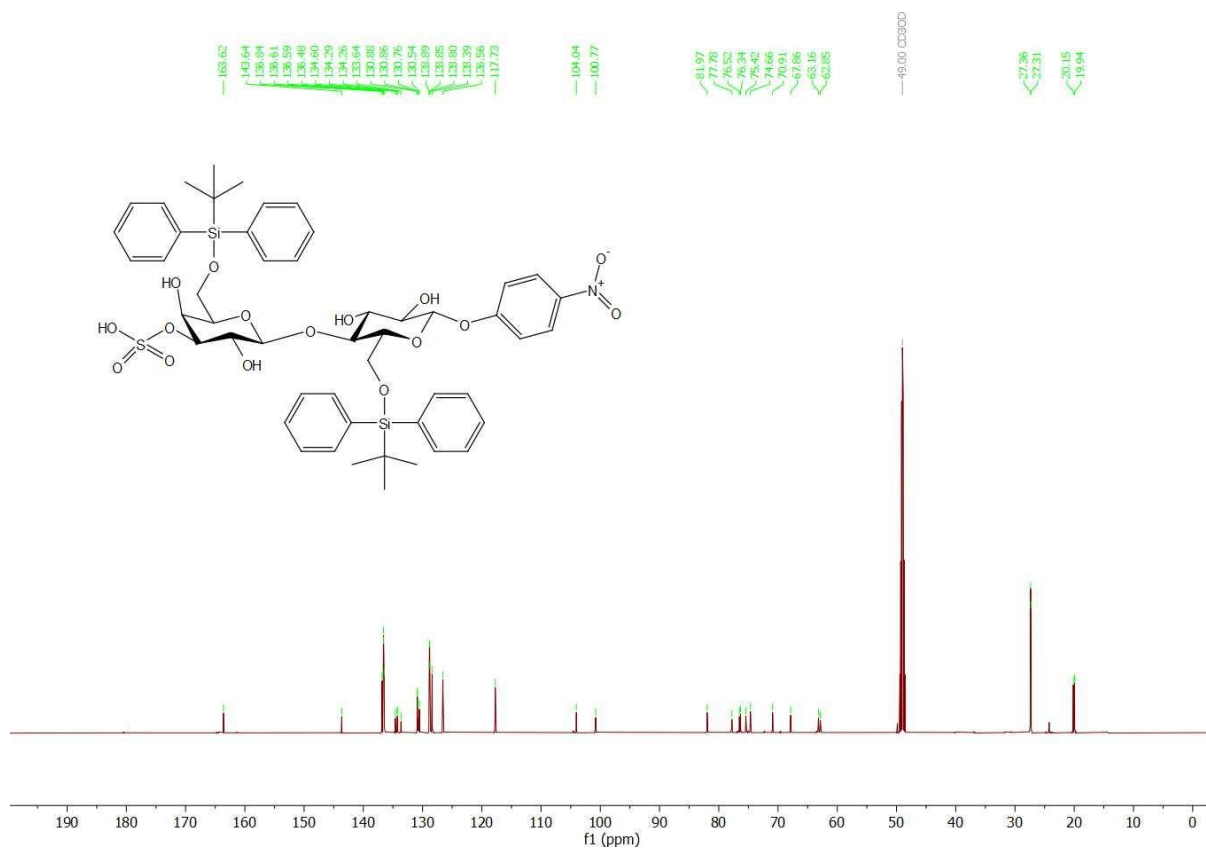

**Figure S12.** <sup>13</sup>C NMR (150 MHz, CD<sub>3</sub>OD) spectrum of compound 10.

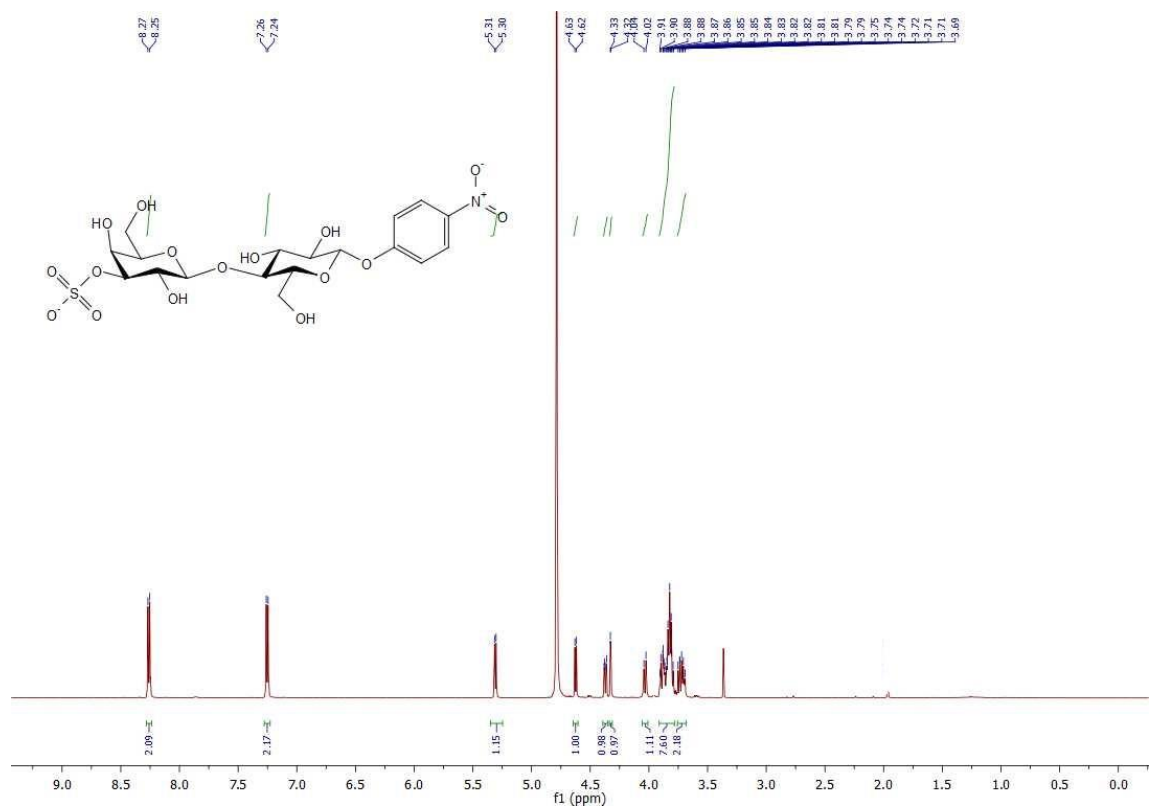

Figure S13. <sup>1</sup>H NMR (600 MHz, D<sub>2</sub>O) spectrum of compound 12.

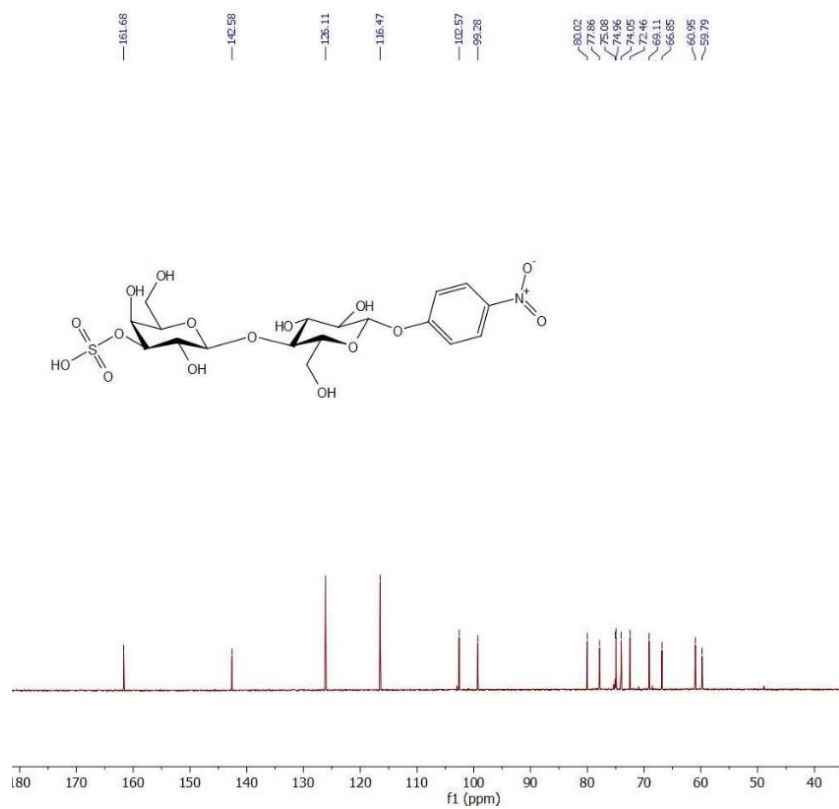

Figure S14. <sup>13</sup>C NMR (150 MHz, D<sub>2</sub>O) spectrum of compound 12.



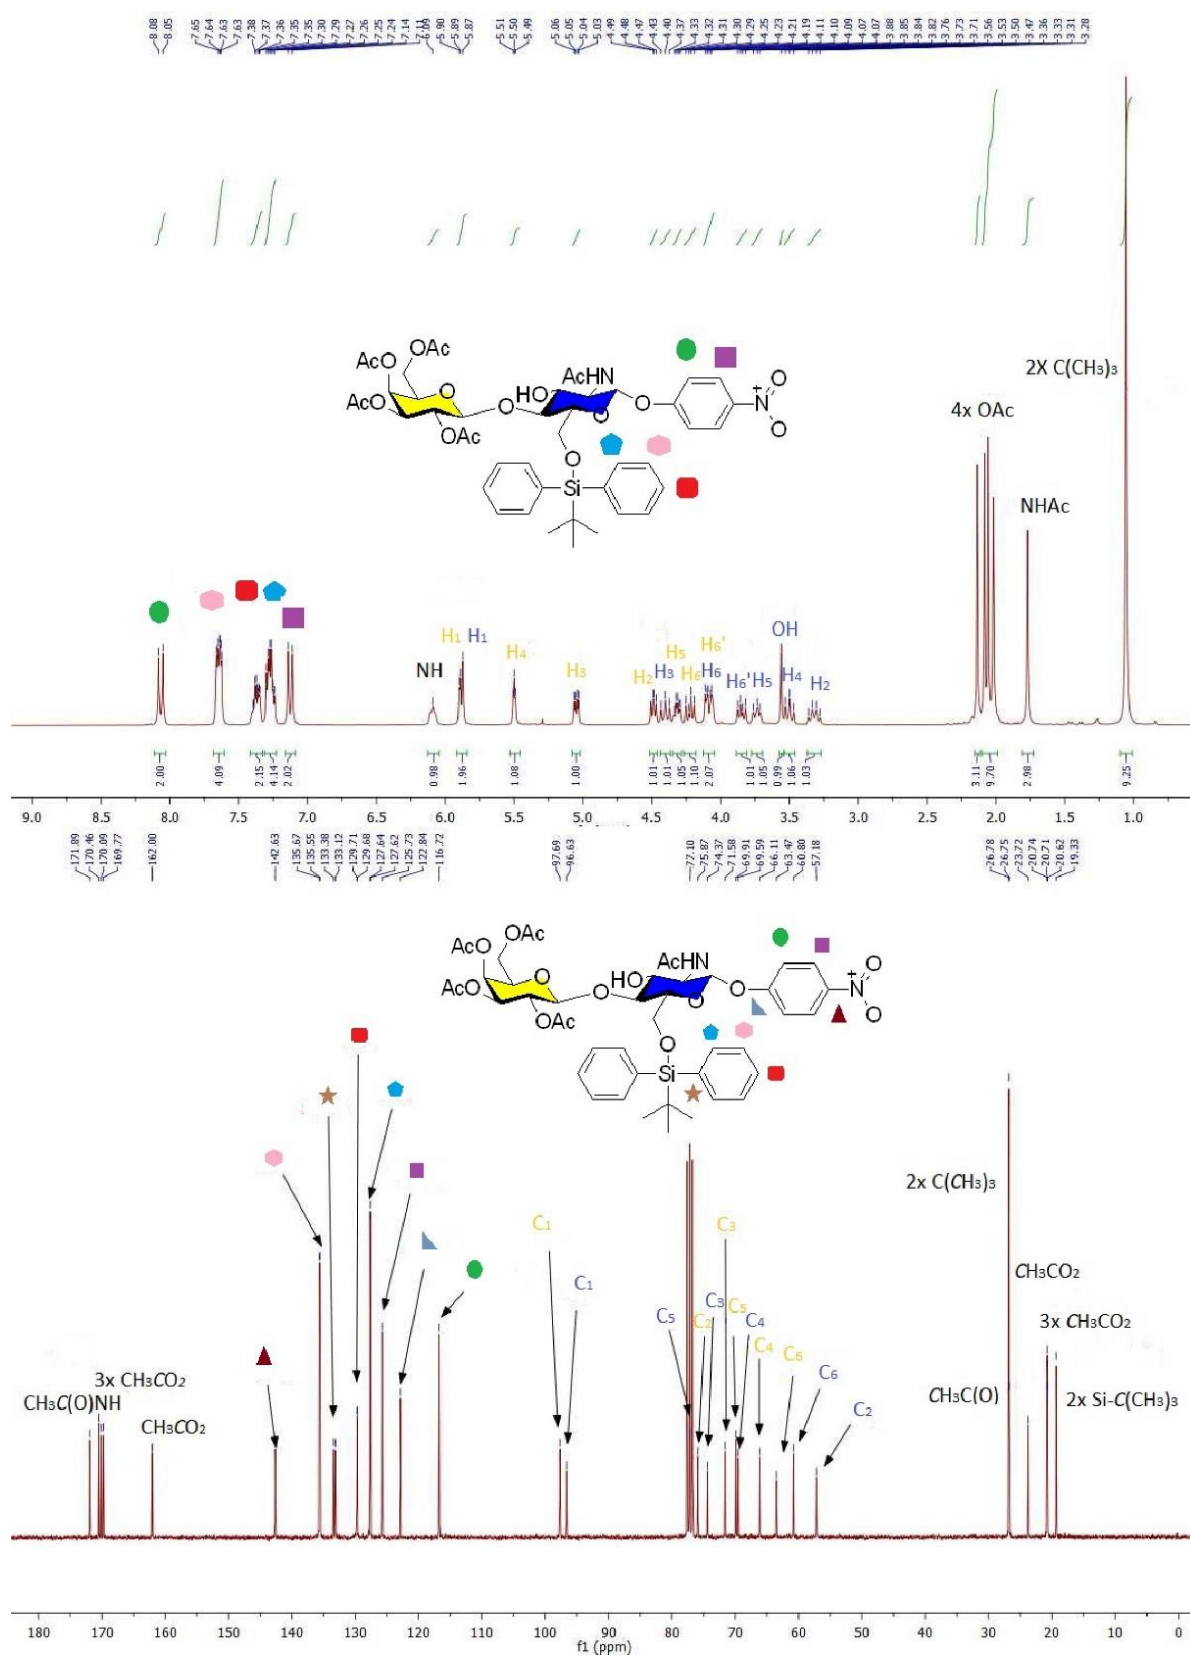

**Figure S17.**  $^1\text{H}$  and  $^{13}\text{C}$  NMR (300 and 75 MHz,  $\text{CDCl}_3$ ) spectra of compound **18** with assignments.

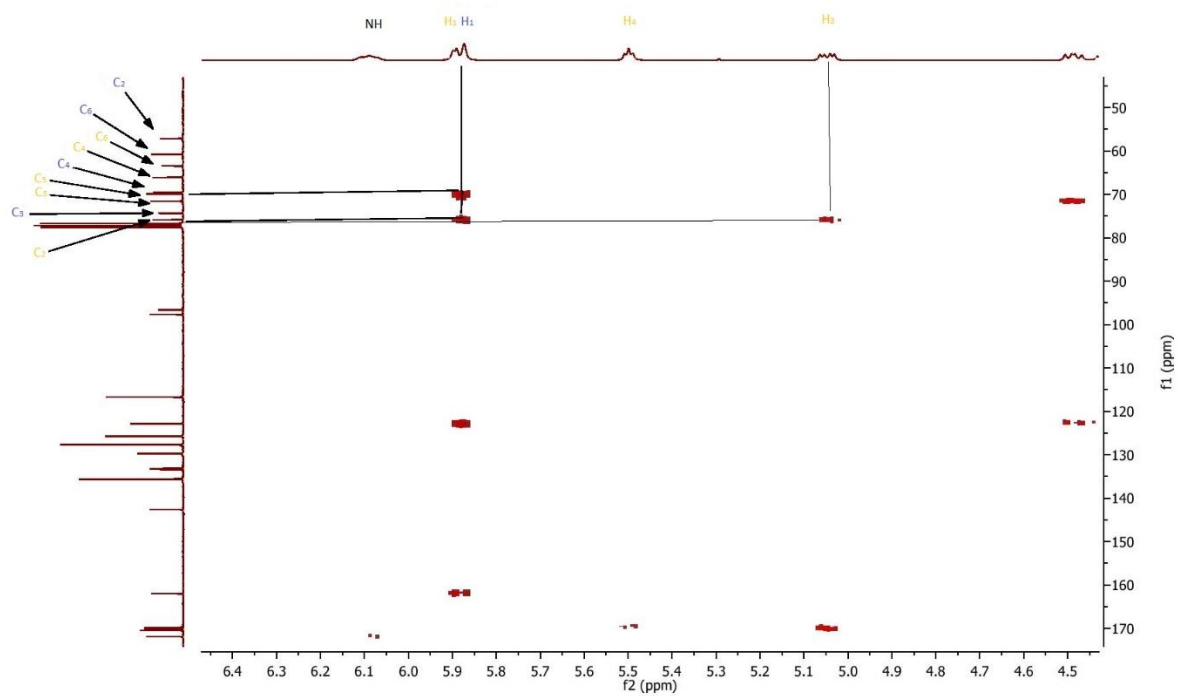

**Figure S18.** HMBC spectrum of compound **18**, correlation between *H*1 (in yellow) and *C*4 (in blue).

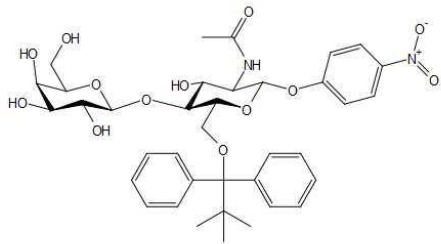

Chemical structure of compound 10b is shown above the spectrum. The structure is a disaccharide derivative: a glucose unit linked to a mannose unit via an  $\alpha$ -1,4-glycosidic bond. The mannose unit is substituted at C2 with a 4-nitrophenyl group and at C4 with a 4-tert-butylphenyl group.

<sup>13</sup>C NMR spectrum (CDCl<sub>3</sub>) showing peaks (ppm):

- 175.82
- 163.50
- 145.90
- 136.92
- 136.69
- 134.86
- 133.97
- 133.71
- 133.60
- 132.74
- 132.47
- 132.67
- 117.68
- 104.84
- 99.42
- 78.85
- 77.40
- 77.01
- 76.55
- 73.99
- 72.51
- 70.39
- 63.09
- 62.68
- 56.63
- 27.95
- 27.55
- 20.23

**Figure S20.**  $^{13}\text{C}$  NMR (75 MHz,  $\text{CD}_3\text{OD}$ ) spectrum of compound **19**.

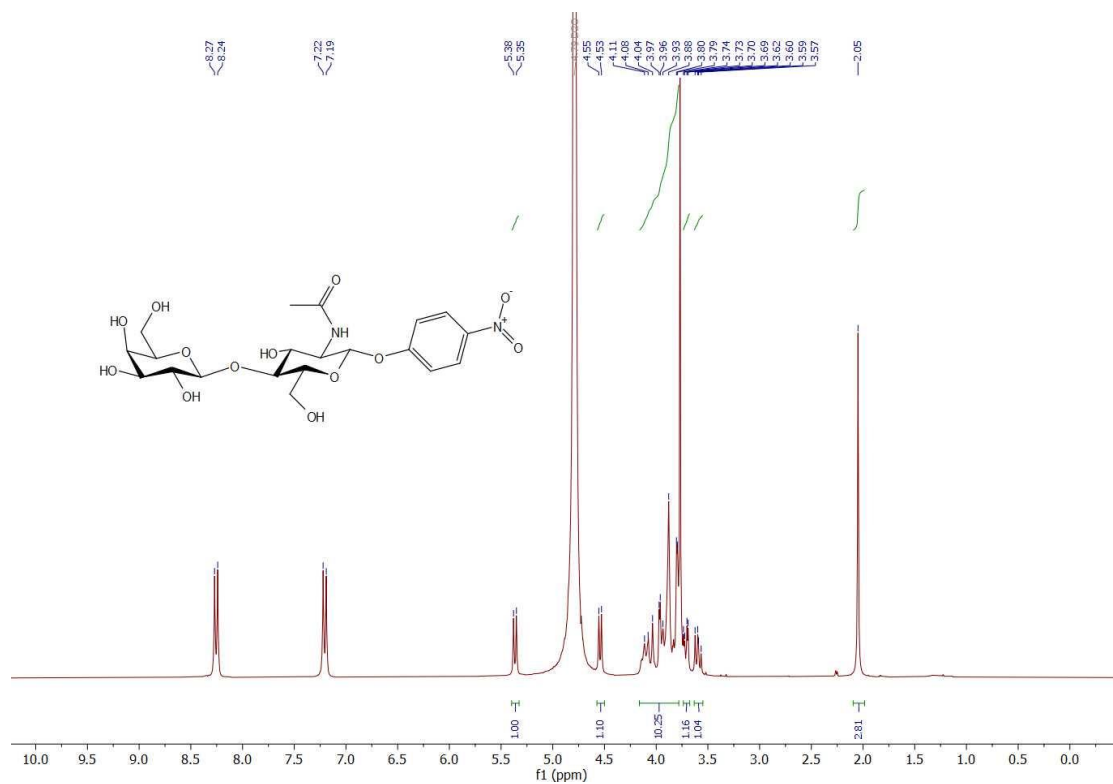

Figure S21. <sup>1</sup>H NMR (300 MHz, D<sub>2</sub>O) spectrum of compound 20.

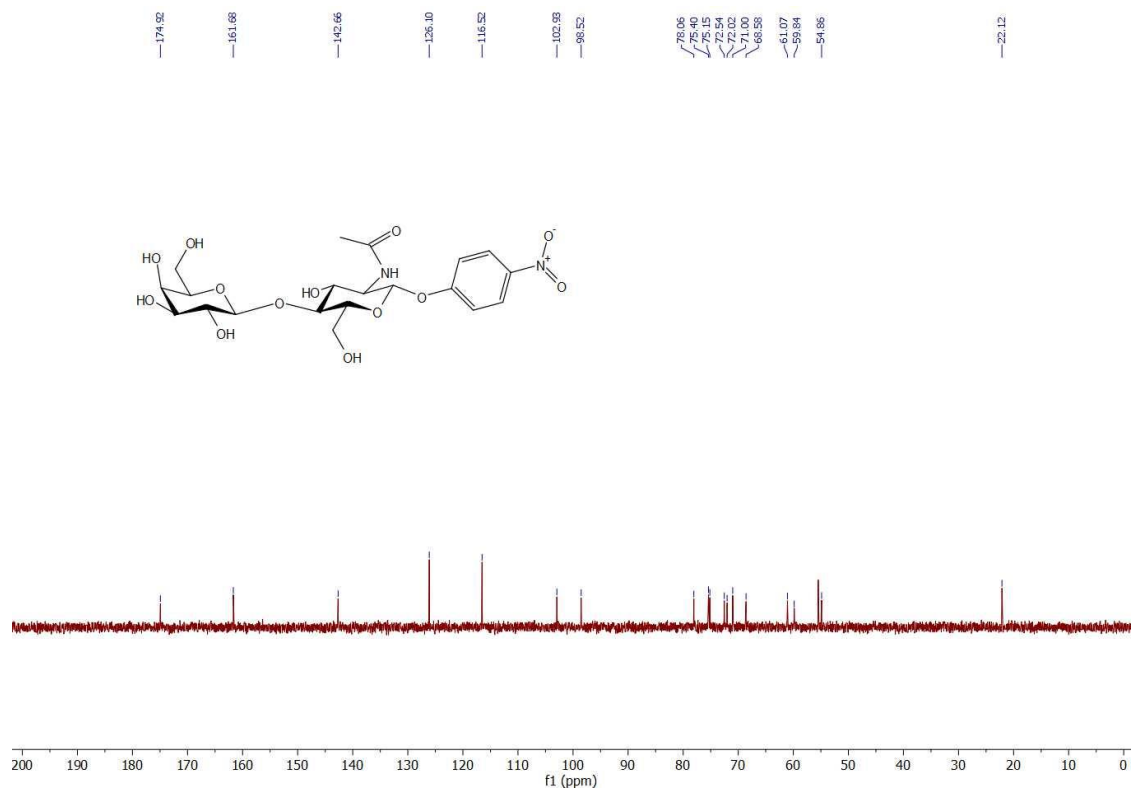

Figure S22. <sup>13</sup>C NMR (75 MHz, D<sub>2</sub>O) spectrum of compound 20

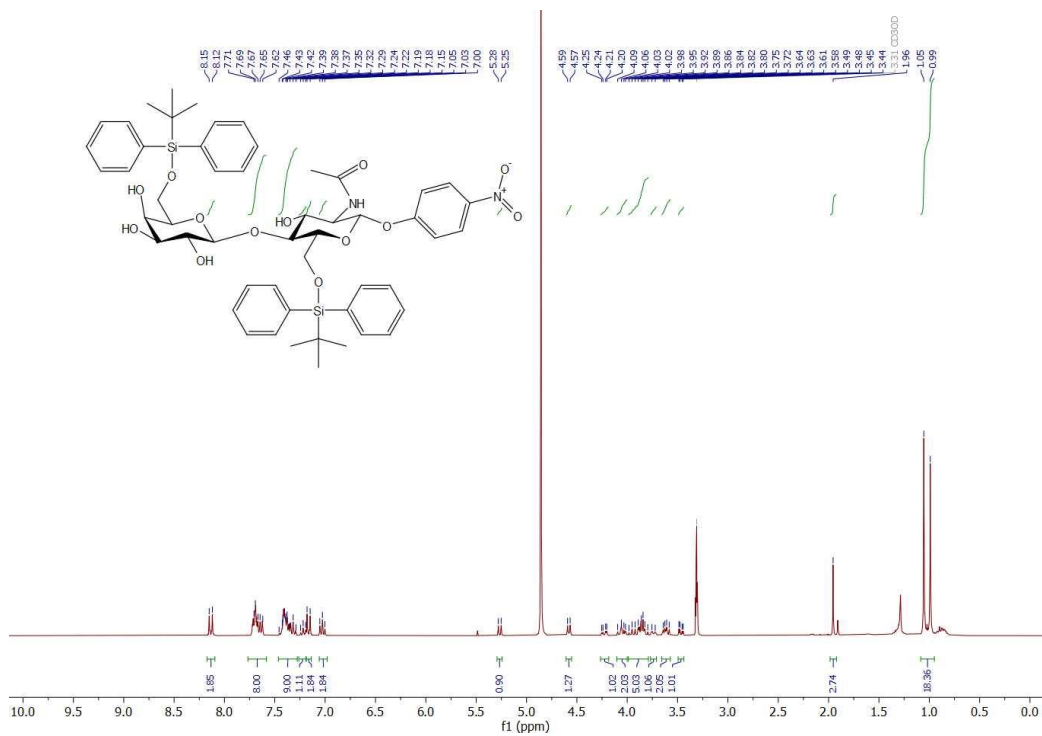

Figure S23.  $^1\text{H}$  NMR (300 MHz,  $\text{CD}_3\text{OD}$ ) spectrum of compound 21.

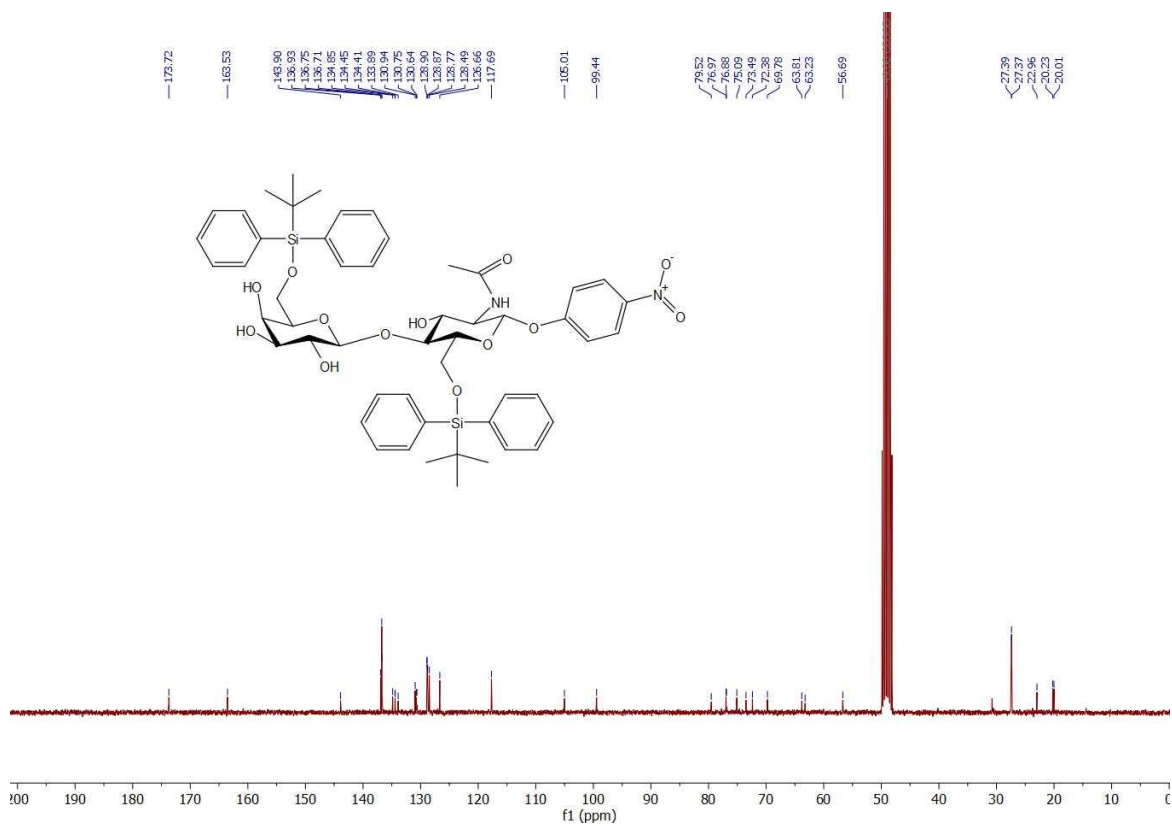

Figure S24.  $^{13}\text{C}$  NMR (75 MHz,  $\text{CD}_3\text{OD}$ ) spectrum of compound 21.

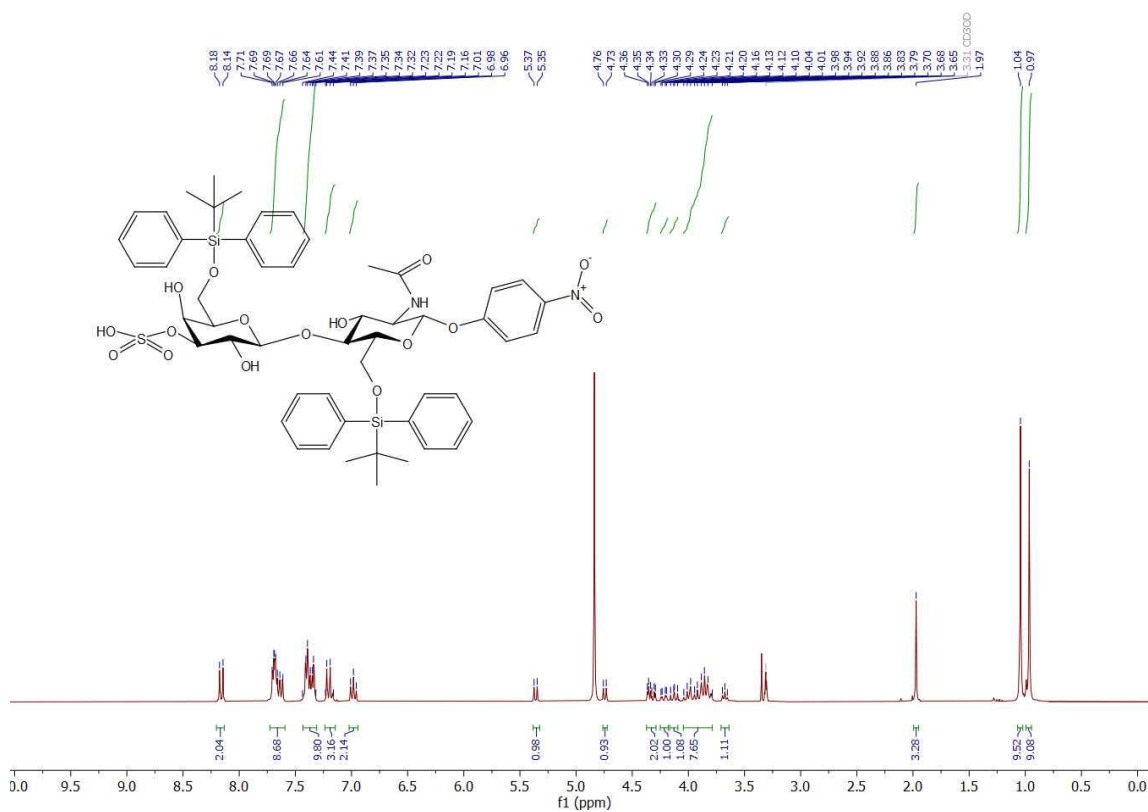

Figure S25. <sup>1</sup>H NMR (300 MHz, CD<sub>3</sub>OD) spectrum of compound 22.

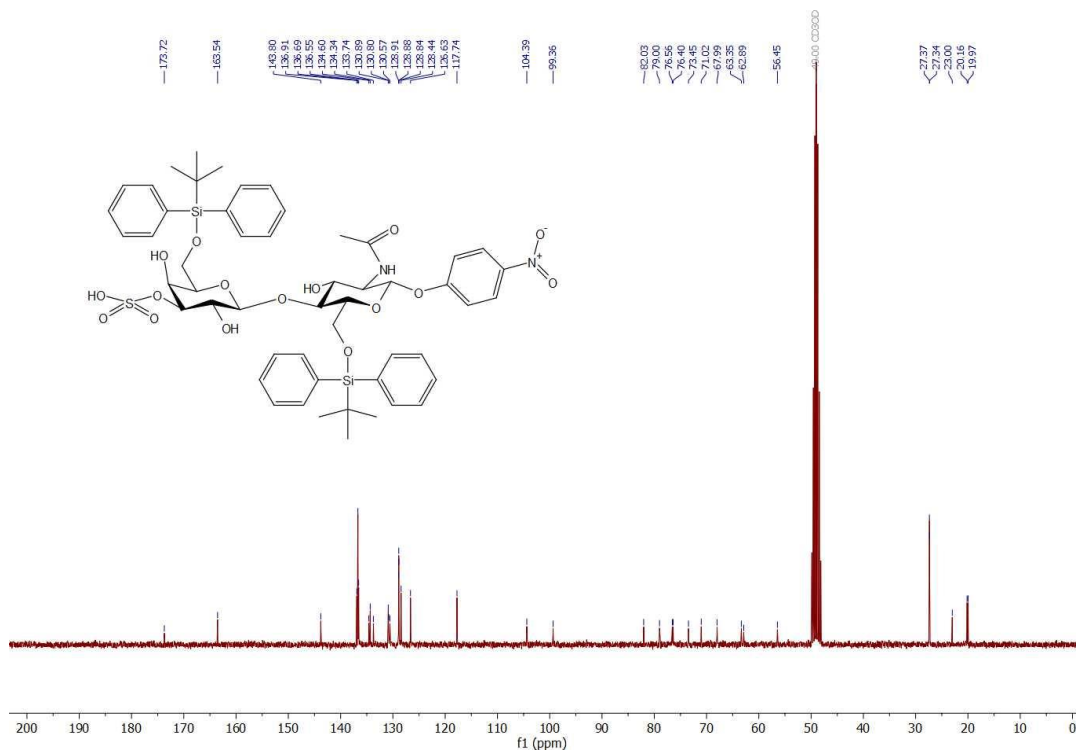

Figure S26. <sup>13</sup>C NMR (75 MHz, CD<sub>3</sub>OD) spectrum of compound 22.

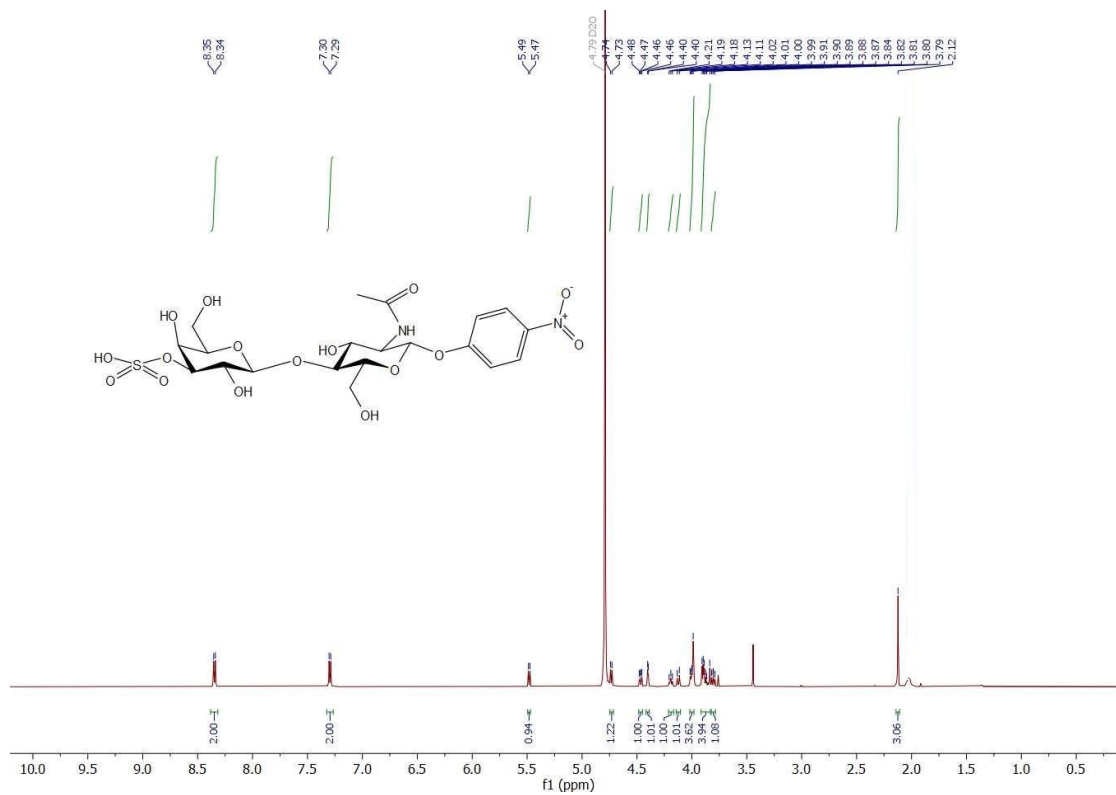

Figure S27. <sup>1</sup>H NMR (600 MHz, D<sub>2</sub>O) spectrum of compound 23.

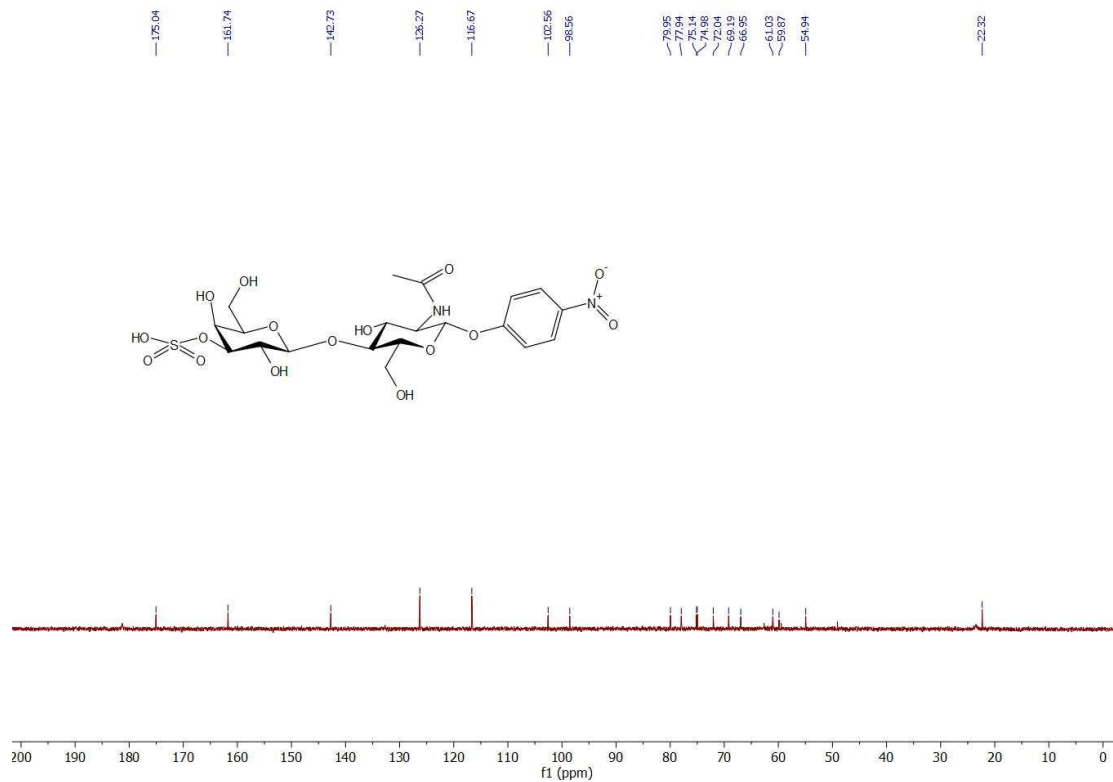

Figure S28. <sup>13</sup>C NMR (75 MHz, D<sub>2</sub>O) spectrum of compound 23.

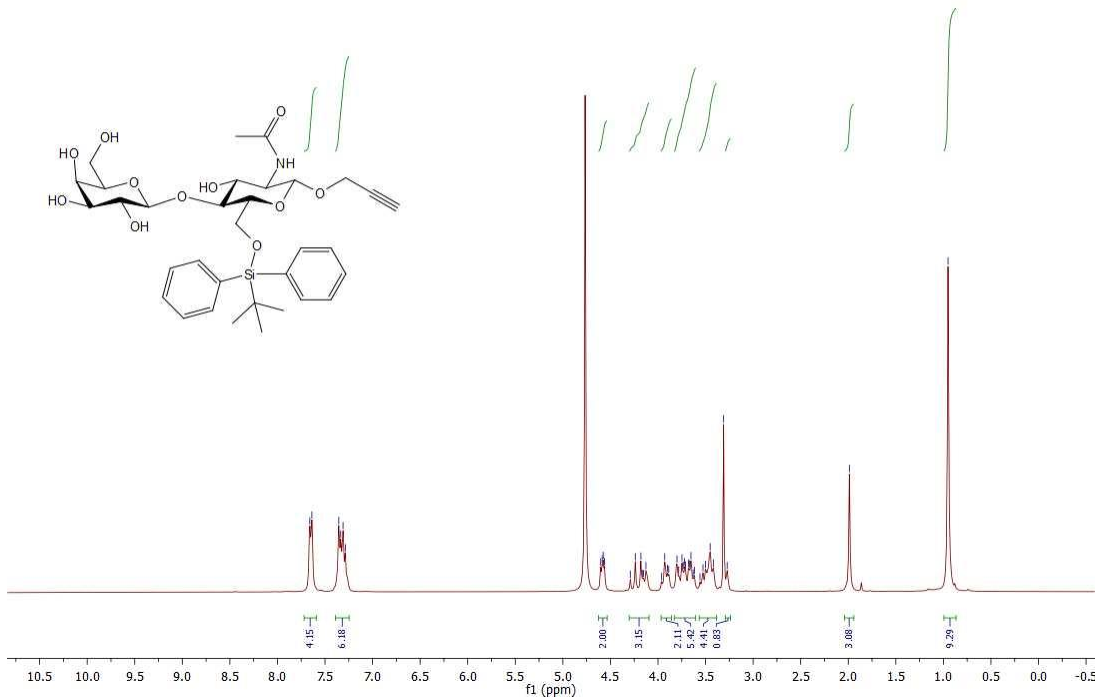

**Figure S29.**  $^1\text{H}$  NMR (300 MHz,  $\text{CD}_3\text{OD}$ ) spectrum of compound **26**.

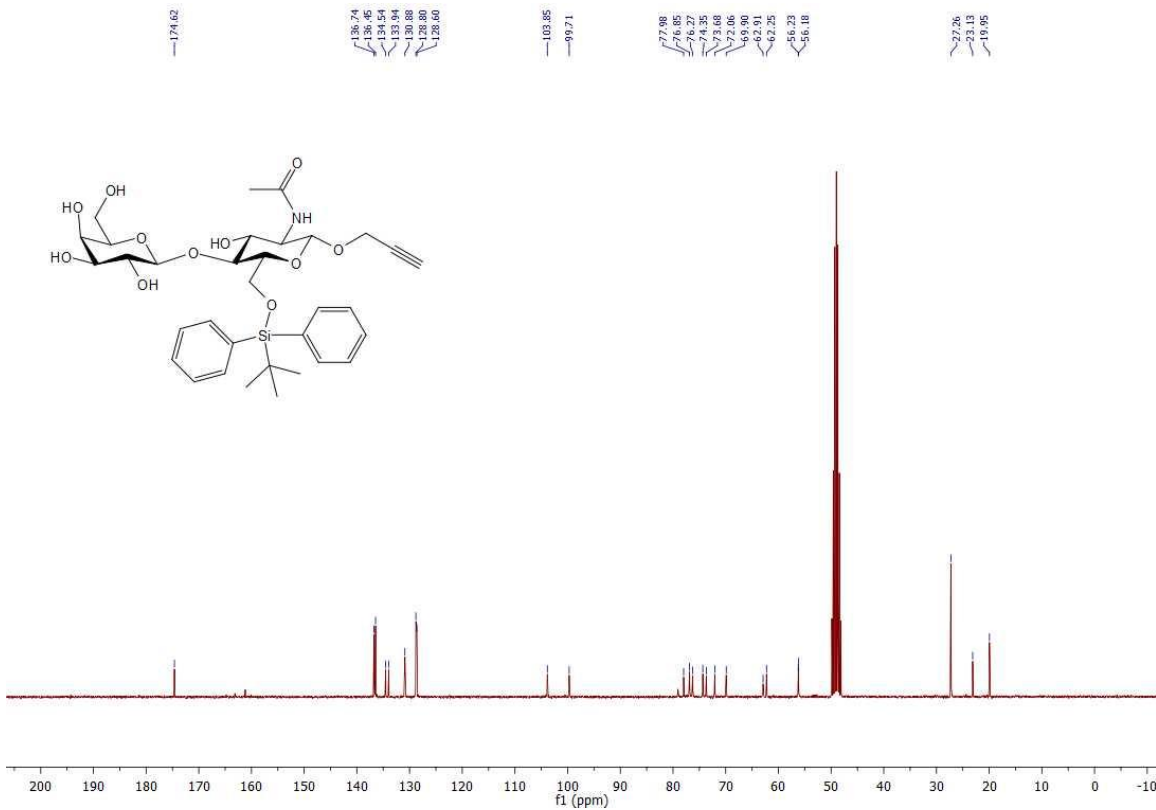

**Figure S30.**  $^{13}\text{C}$  NMR (75 MHz,  $\text{CD}_3\text{OD}$ ) spectrum of compound **26**.

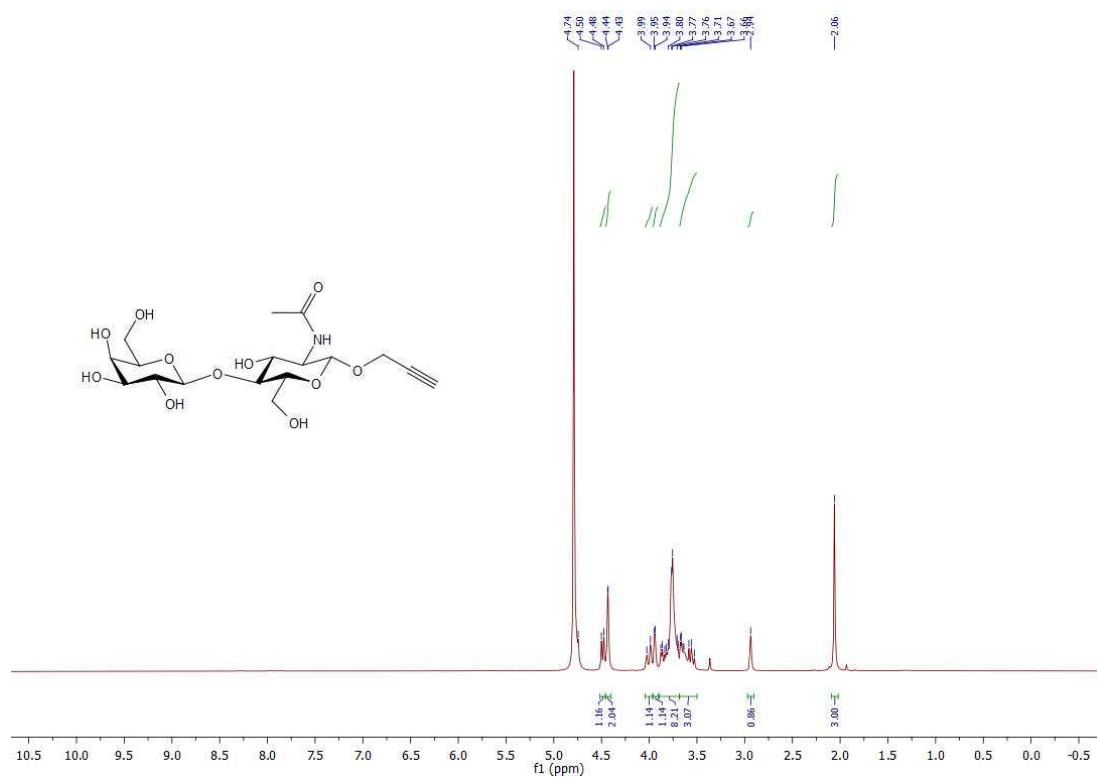

Figure S31. <sup>1</sup>H NMR (300 MHz, D<sub>2</sub>O) spectrum of compound 27

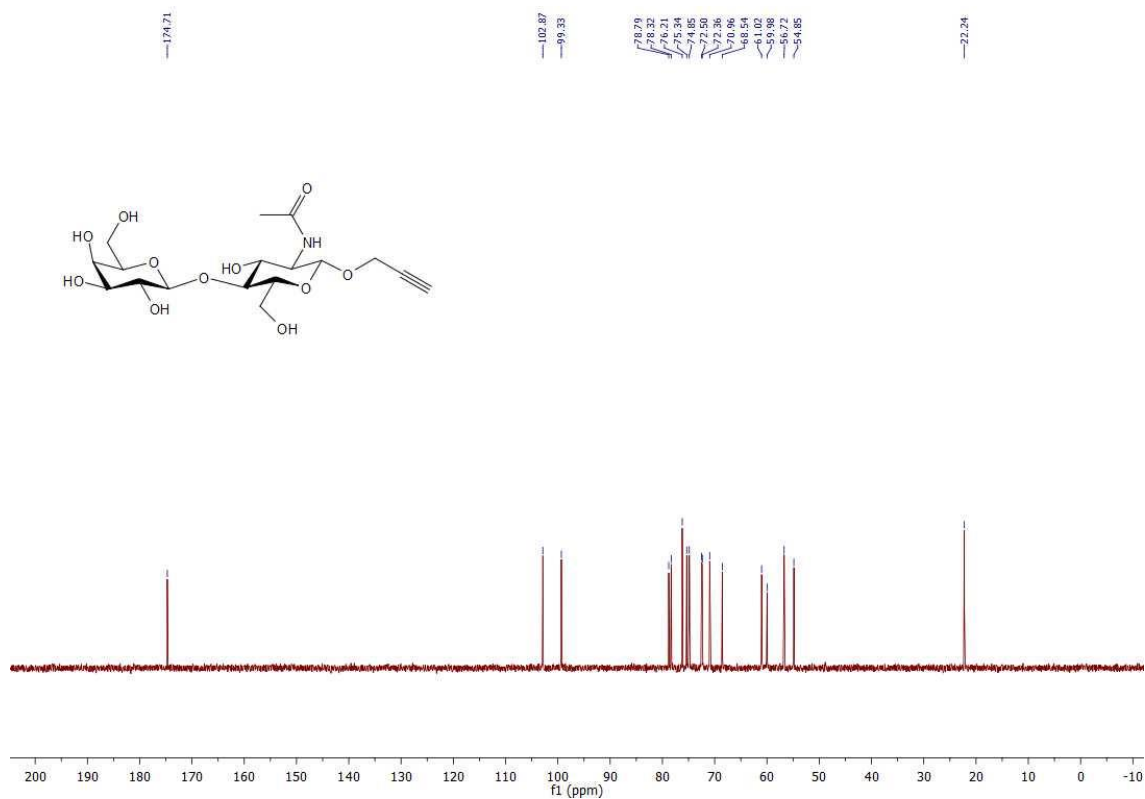

Figure S32. <sup>13</sup>C NMR (75 MHz, D<sub>2</sub>O) spectrum of compound 27.

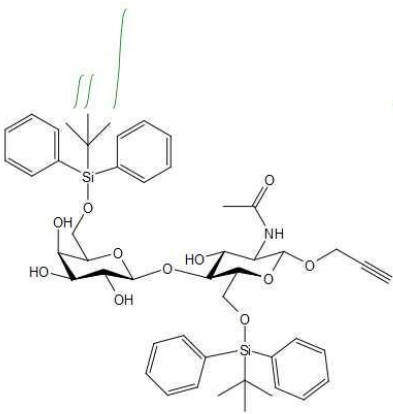

**Figure S33.**  $^1\text{H}$  NMR (300 MHz,  $\text{CD}_3\text{OD}$ ) spectrum of compound **28**.

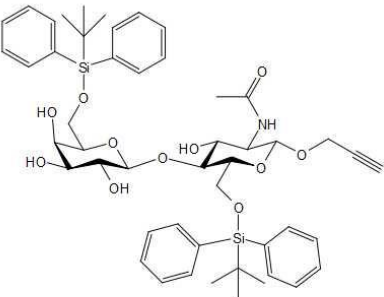

**Figure S34.**  $^{13}\text{C}$  NMR (75 MHz,  $\text{CD}_3\text{OD}$ ) spectrum of compound **28**.



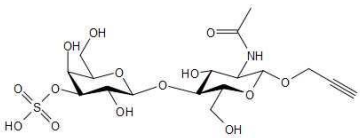

**Figure S37.**  $^1\text{H}$  NMR (300 MHz,  $\text{D}_2\text{O}$ ) spectrum of compound **30**.

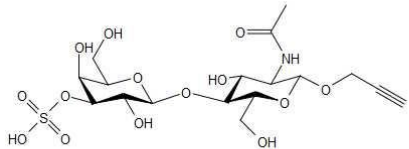

**Figure S38.**  $^{13}\text{C}$  NMR (75 MHz,  $\text{D}_2\text{O}$ ) spectrum of compound **30**.

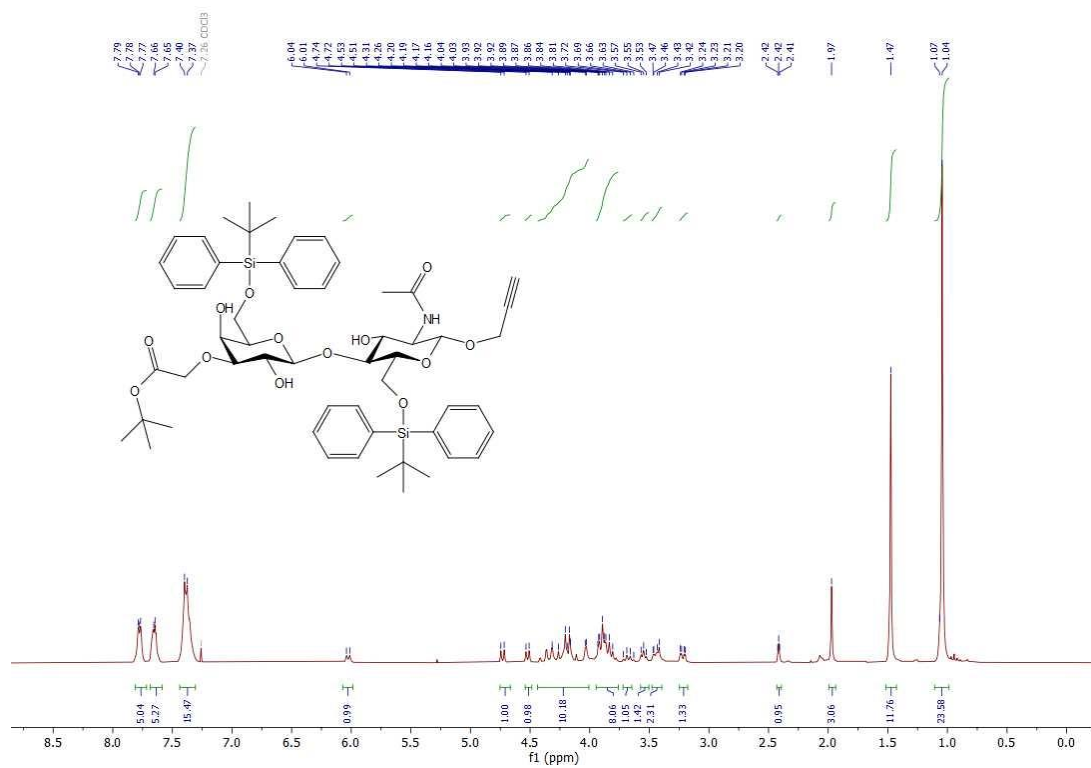

Figure S39. <sup>1</sup>H NMR (300 MHz, CDCl<sub>3</sub>) spectrum of compound 31.

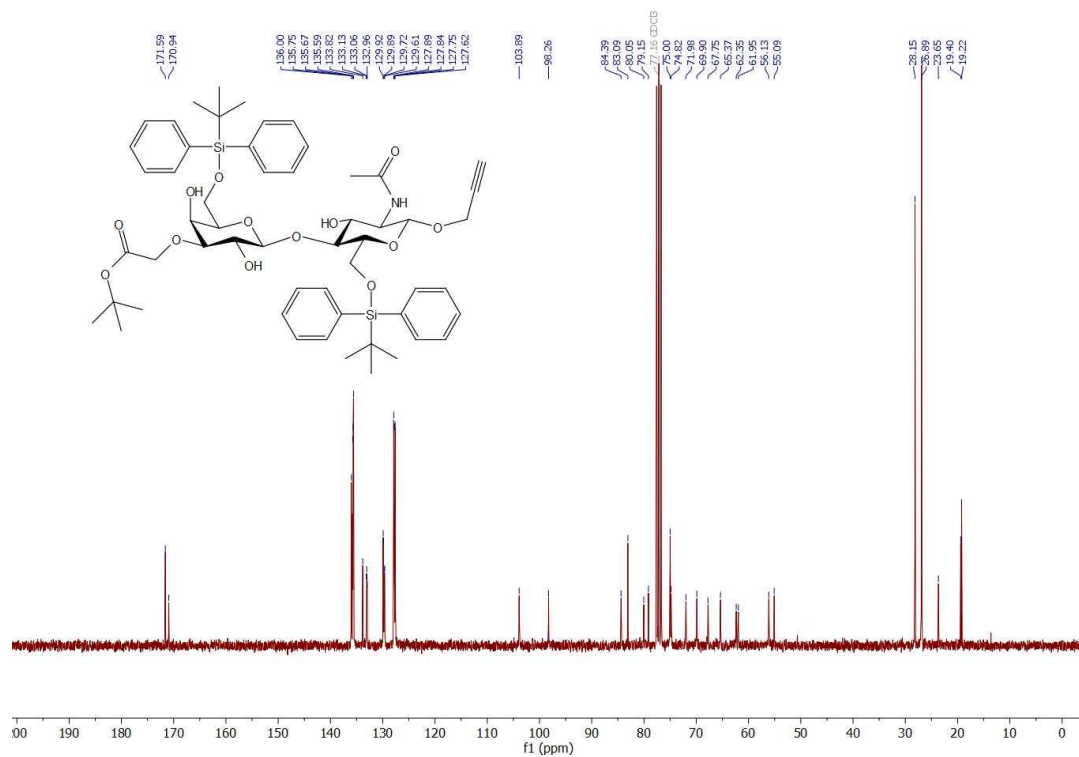

Figure S40. <sup>13</sup>C NMR (75 MHz, CDCl<sub>3</sub>) spectrum of compound 31.

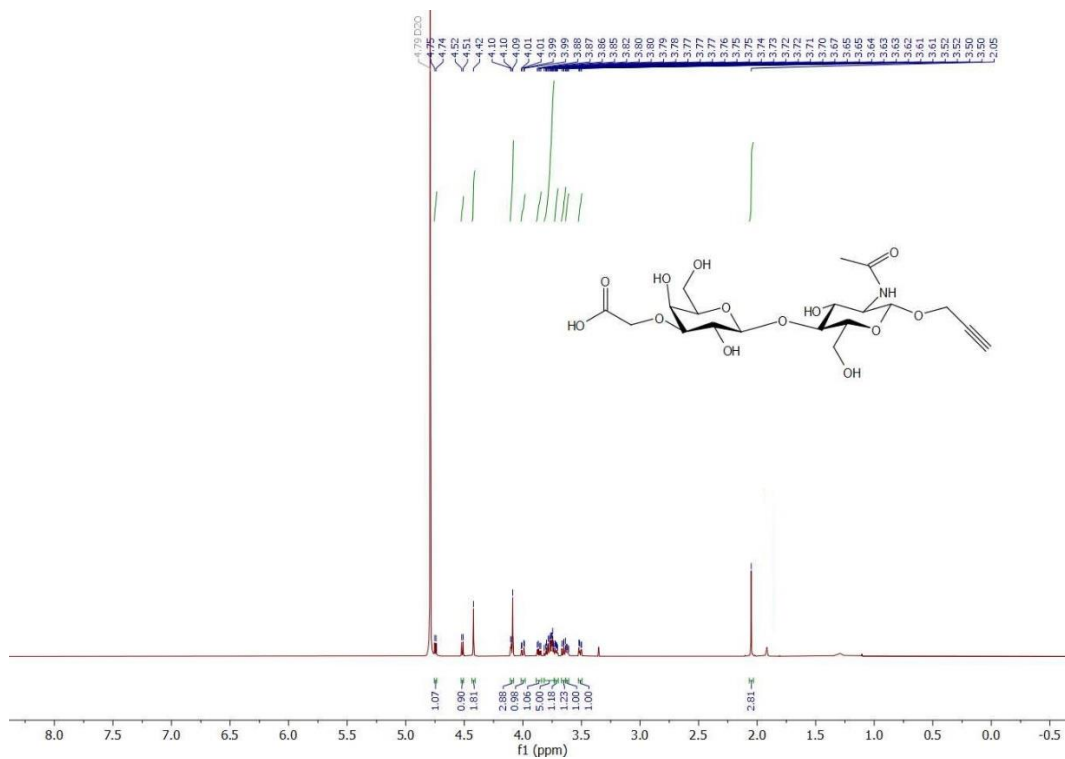

**Figure S41.** <sup>1</sup>H NMR (600 MHz, D<sub>2</sub>O) spectrum of compound **32**.

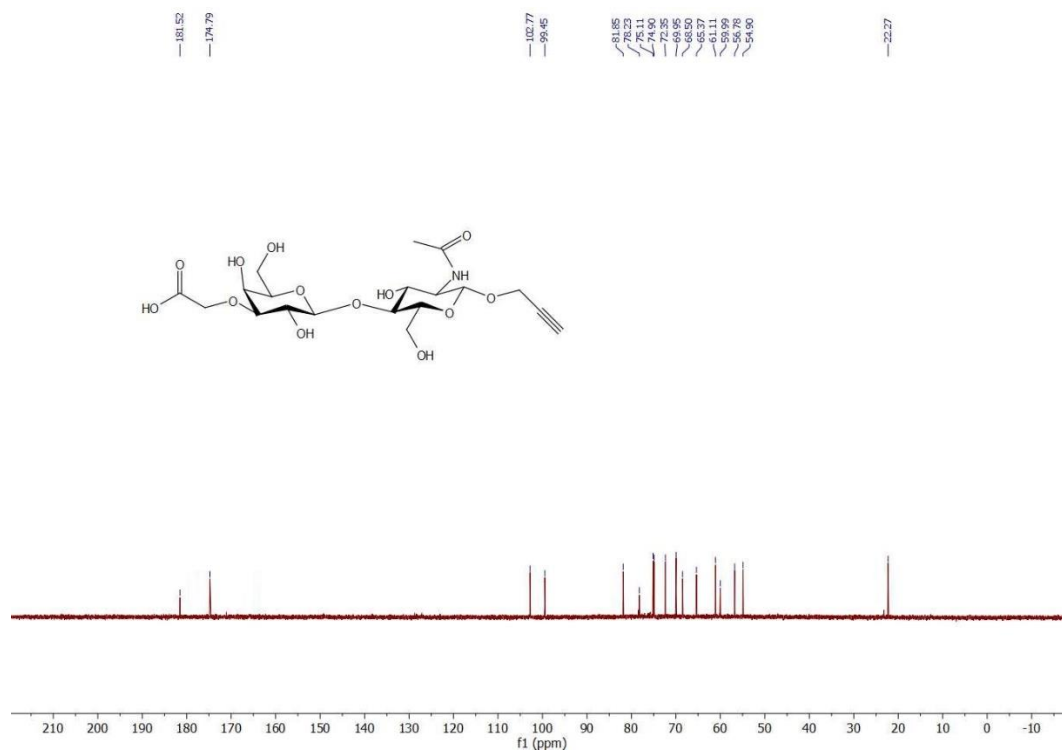

**Figure S42.** <sup>13</sup>C NMR (150 MHz, D<sub>2</sub>O) spectrum of compound **32**.

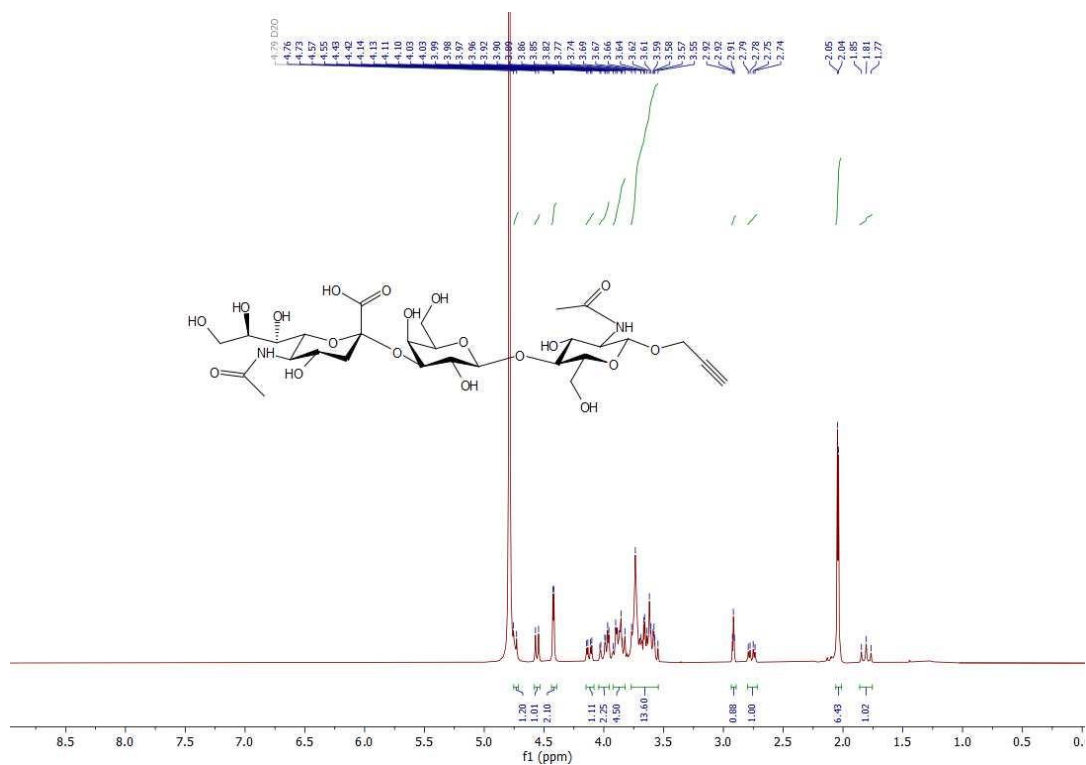

Figure S43. <sup>1</sup>H NMR (300 MHz, D<sub>2</sub>O) spectrum of compound 33.

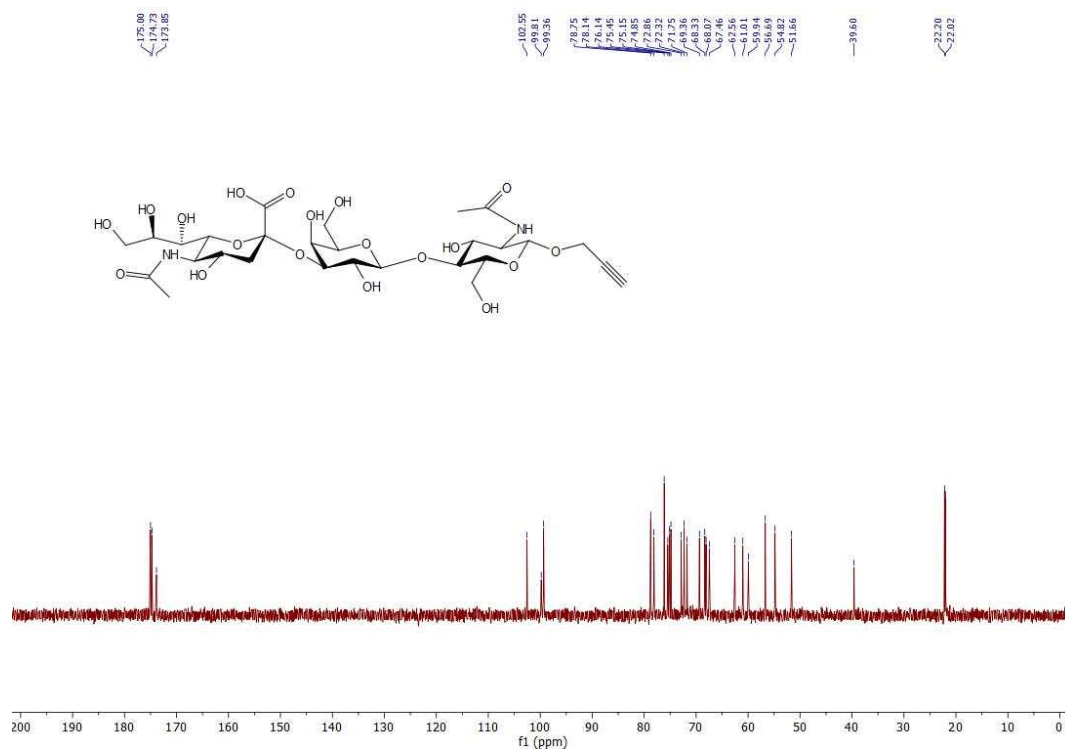

Figure S44. <sup>13</sup>C NMR (75 MHz, D<sub>2</sub>O) spectrum of compound 33.
